# Supplementary material for: Starvation-induced metabolic rewiring affects mTORC1 composition in vivo
Source: PubMed Central journal article supplement (PMC11569187; doi:10.1038/s41598-024-78873-7), 2024-11-16
Supplement: 41598_2024_78873_MOESM1_ESM.pdf [file 41598_2024_78873_MOESM1_ESM.pdf]

## Starvation-induced metabolic rewiring affects mTORC1 composition *in vivo*

Kaade, Edgar<sup>1</sup>; Mausbach, Simone<sup>1</sup>; Erps, Nina<sup>2</sup>; Sylvester, Marc<sup>1,3</sup>; Shakeri, Farhad<sup>4,5</sup>; Jachimowicz, Ron D.<sup>2,6,7</sup>; Gieselmann, Volkmar<sup>1</sup>; Thelen, Melanie<sup>1,2,6\*</sup>

<sup>1</sup> Institute for Biochemistry and Molecular Biology, Medical Faculty, Rheinische Friedrich-Wilhelms-University of Bonn, 53115 Bonn, Germany

<sup>2</sup> Max-Planck Institute for Biology of Ageing, 50931 Cologne, Germany

<sup>3</sup> Core Facility Analytical Proteomics, Medical Faculty, Rheinische Friedrich-Wilhelms-University of Bonn, 53115 Bonn, Germany

<sup>4</sup> Institute for Medical Biometry, Informatics and Epidemiology, Medical Faculty, University of Bonn, Venusberg-Campus 1, 53127 Bonn, Germany

<sup>5</sup> Institute for Genomic Statistics and Bioinformatics, Medical Faculty, University of Bonn, Venusberg-Campus 1, 53127 Bonn, Germany

<sup>6</sup> Department I of Internal Medicine, Center for Integrated Oncology Aachen Bonn Cologne Duesseldorf (CIO ABCD), University of Cologne, Cologne, Germany

<sup>7</sup> Cologne Excellence Cluster on Cellular Stress Response in Aging-Associated Diseases, University of Cologne, Cologne, Germany

### Supplementary Figures

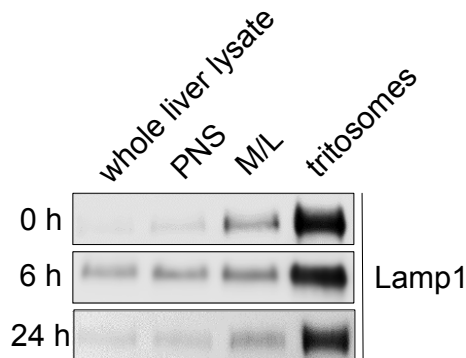

**Supplementary Figure 1: Verification of comparable lysosomal enrichment after tritosome isolation by LAMP1 immunoblotting of different fractions.** Equal protein amounts of each fraction were loaded. PNS= postnuclear supernatant, M/L=mitochondria/lysosome fraction.

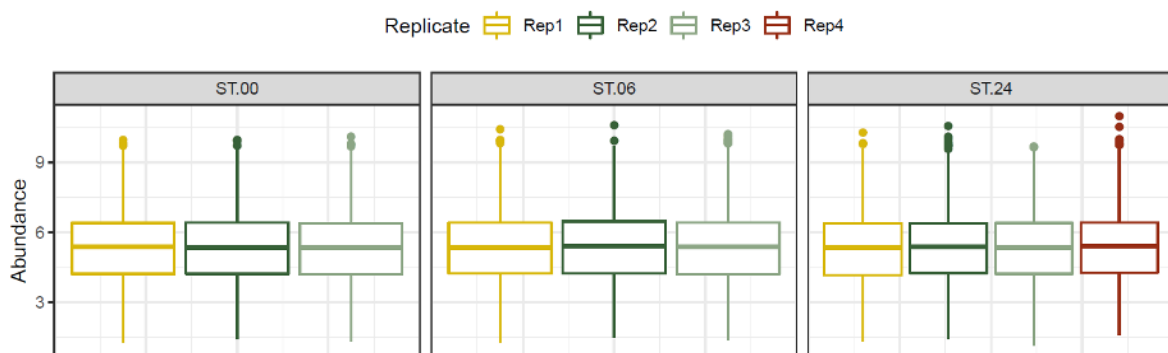

**Supplementary Figure 2: Distribution of replicates after normalization. ST=Starvation.**

Proteomic data were normalized by the variance stabilizing normalization method (VSN).

Normalized values were used to display boxplot by ggplot2 3.2.0 software. Boxplots represent every replicate of control (n=3), 6 (n=3) and 24 (n=24) hours starved mice.

Summarized proteins of each replicate were represented by abundance values. Outliers are displayed as additional dots at the appropriate replicates.

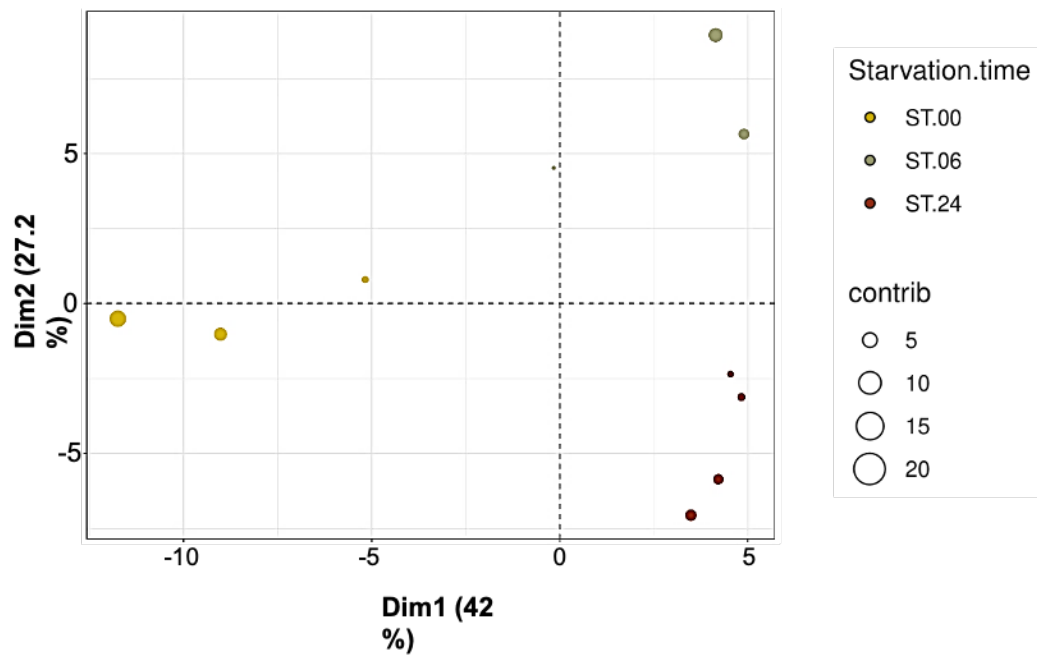

**Supplementary Figure 3: Clustering of replicates visualized by boxplot.** Principal component analysis plot using FactoMineR 1.42 software. Three groups of replicates demonstrating each condition are represented with a particular colored dot (Yellow: control group, green: 6 hours starved group, red: 24 hours starved group). Dot sizes diverse based on their contribution to each dimension (Dim1 and Dim2).
