# Supplementary material for: Starvation-induced metabolic rewiring affects mTORC1 composition in vivo
Source: PubMed Central journal article supplement (PMC11569187; doi:10.1038/s41598-024-78873-7), 2024-11-16
Supplement: 41598_2024_78873_MOESM3_ESM.pdf [file 41598_2024_78873_MOESM3_ESM.pdf]

## **Starvation-induced metabolic rewiring affects mTORC1 composition *in vivo***

Kaade, Edgar<sup>1</sup>; Mausbach, Simone<sup>1</sup>; Erps, Nina<sup>2</sup>; Sylvester, Marc<sup>1,3</sup>; Shakeri, Farhad<sup>4,5</sup>; Jachimowicz, Ron D.<sup>2,6,7</sup>; Gieselmann, Volkmar<sup>1</sup>; Thelen, Melanie<sup>1,2,6\*</sup>

<sup>1</sup> Institute for Biochemistry and Molecular Biology, Medical Faculty, Rheinische Friedrich-Wilhelms-University of Bonn, 53115 Bonn, Germany

<sup>2</sup> Max-Planck Institute for Biology of Ageing, 50931 Cologne, Germany

<sup>3</sup> Core Facility Analytical Proteomics, Medical Faculty, Rheinische Friedrich-Wilhelms-University of Bonn, 53115 Bonn, Germany

<sup>4</sup> Institute for Medical Biometry, Informatics and Epidemiology, Medical Faculty, University of Bonn, Venusberg-Campus 1, 53127 Bonn, Germany

<sup>5</sup> Institute for Genomic Statistics and Bioinformatics, Medical Faculty, University of Bonn, Venusberg-Campus 1, 53127 Bonn, Germany

<sup>6</sup> Department I of Internal Medicine, Center for Integrated Oncology Aachen Bonn Cologne Duesseldorf (CIO ABCD), University of Cologne, Cologne, Germany

<sup>7</sup> Cologne Excellence Cluster on Cellular Stress Response in Aging-Associated Diseases, University of Cologne, Cologne, Germany

### **Supplementary Information – Western Blot full data**

All Western Blot were developed with Fusion Chemiluminescence developer (Vilber, France). Shown are mostly merged pictures of blot and size marker picture. Size of nearest marker band is indicated.

**Figure 3**

tritosomes

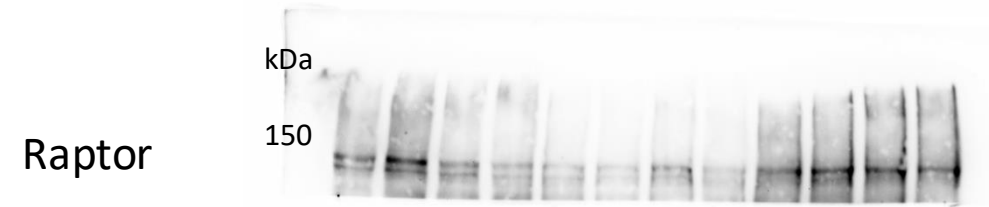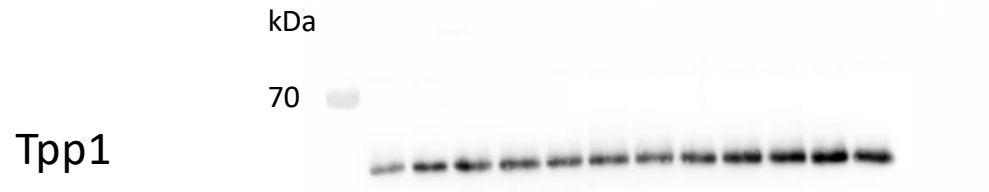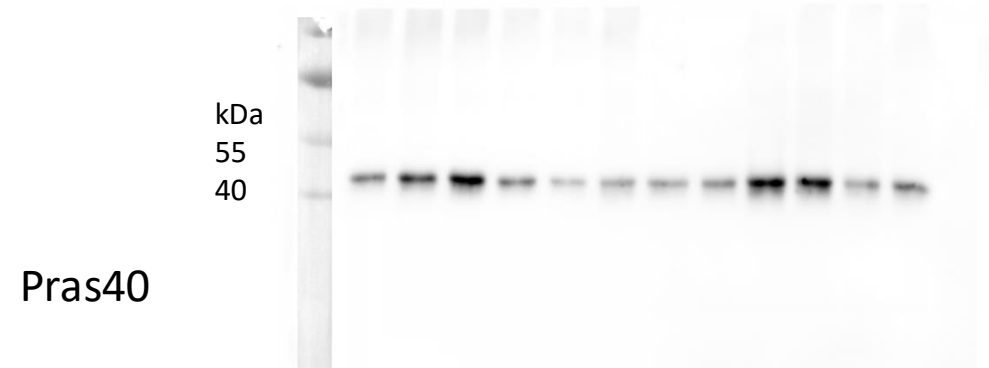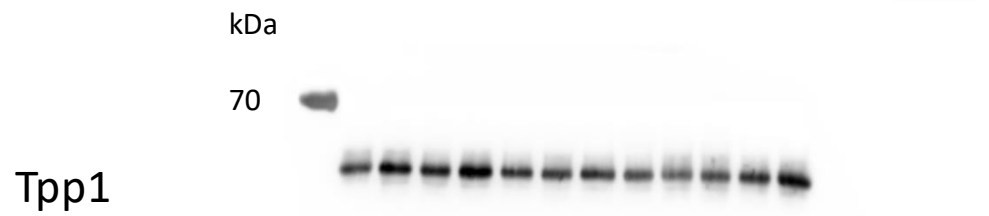

liver lysate

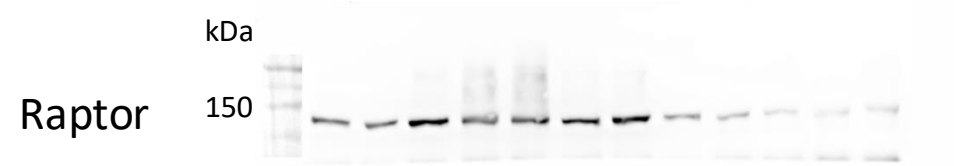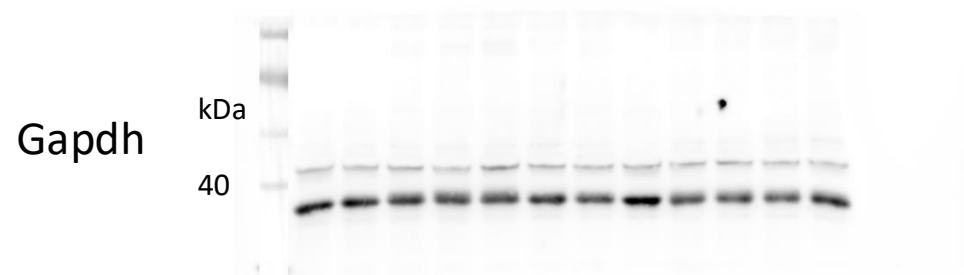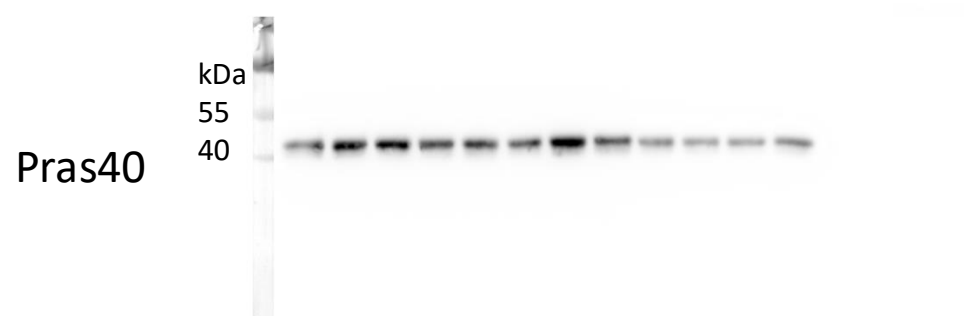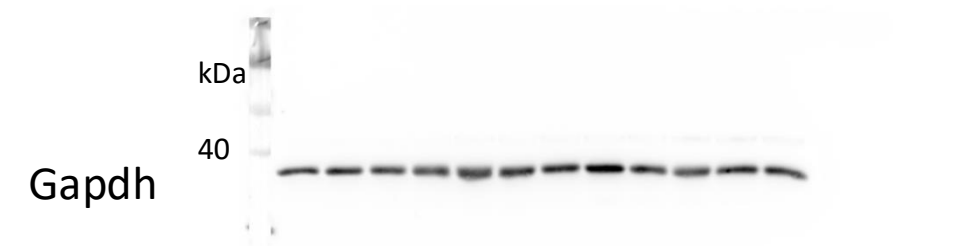

**Figure 3**

tritosomes

RagA

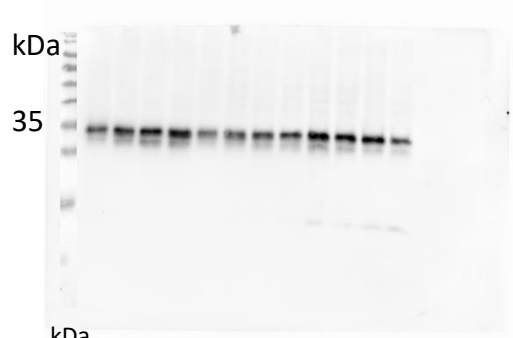

Tpl1

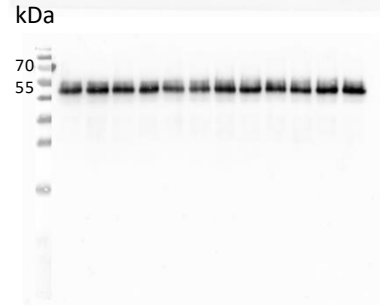

RagC

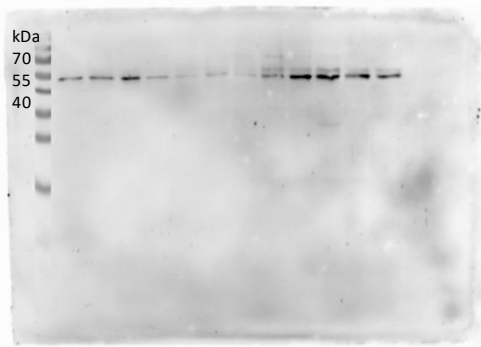

Tpl1

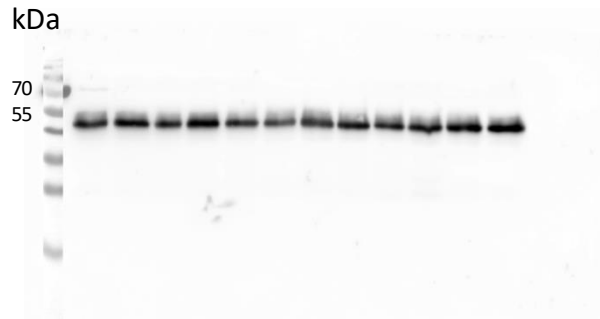

liver lysate

RagA

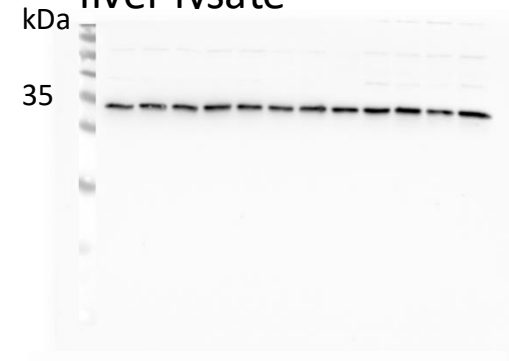

Gapdh

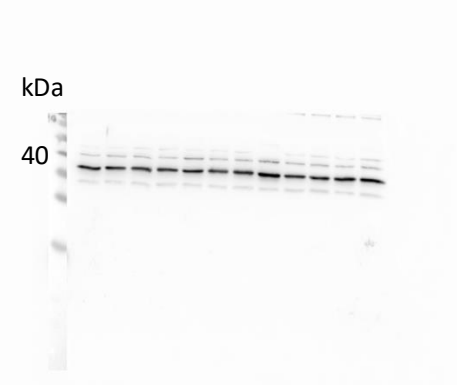

RagC

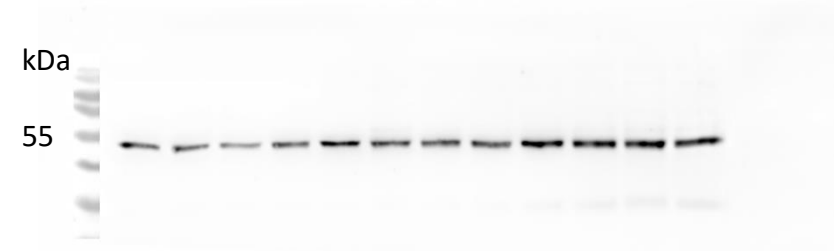

Gapdh

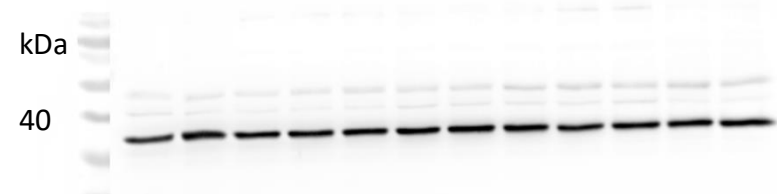

**Figure 3**

tritosomes

liver lysate

Lamtor 1

Lamtor 1

Tpp1

Gapdh

Lamtor 2

Lamtor 2

Tpp1

Gapdh

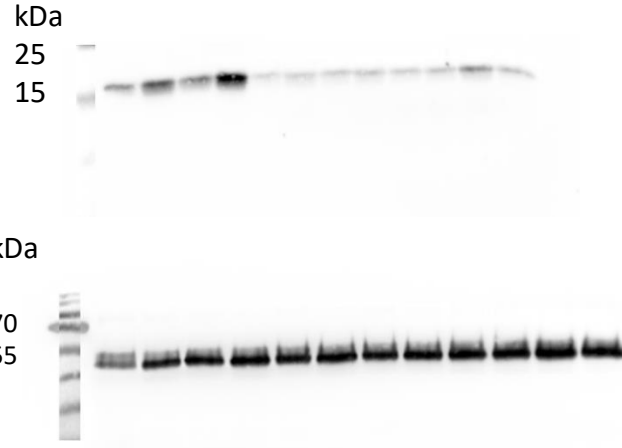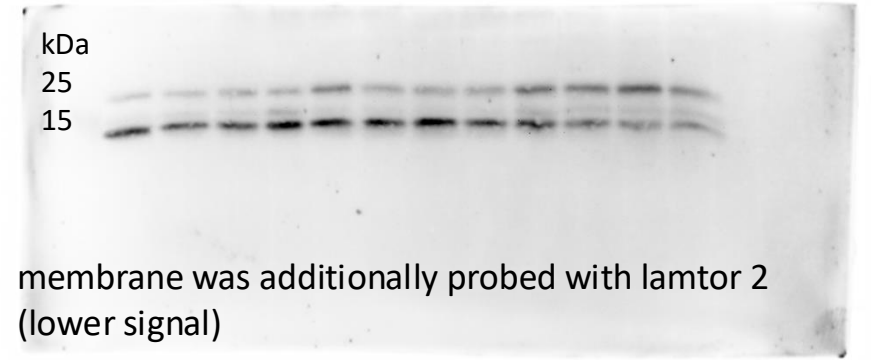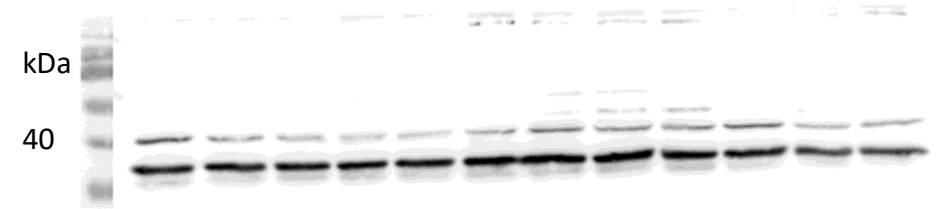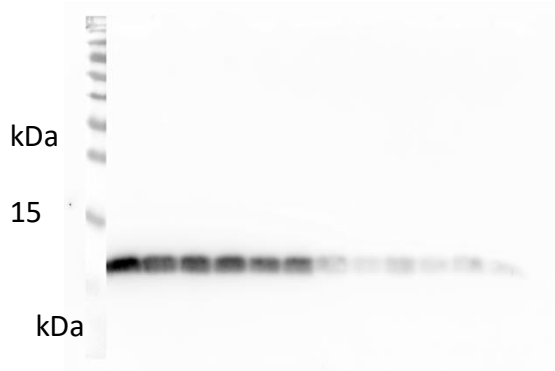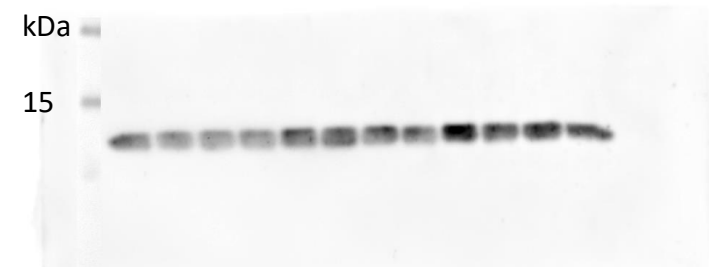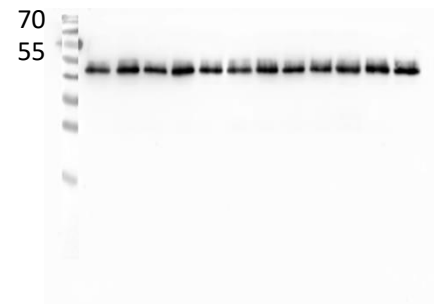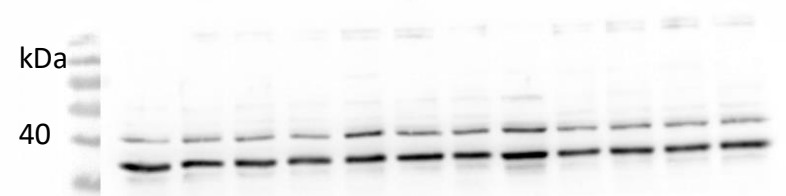

**Figure 3**

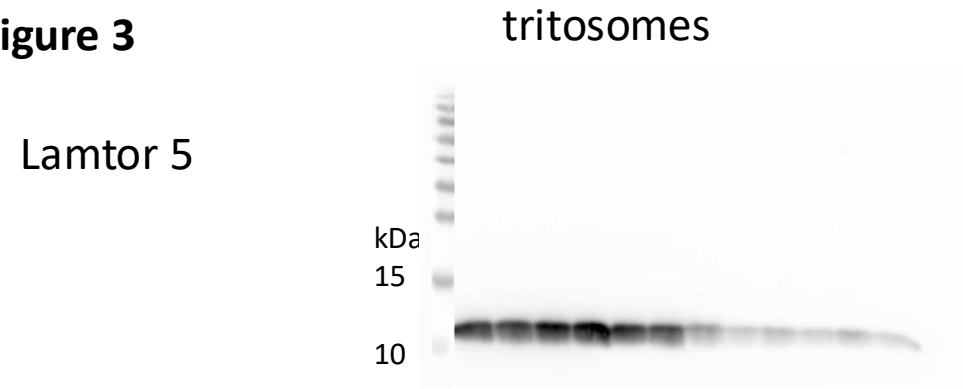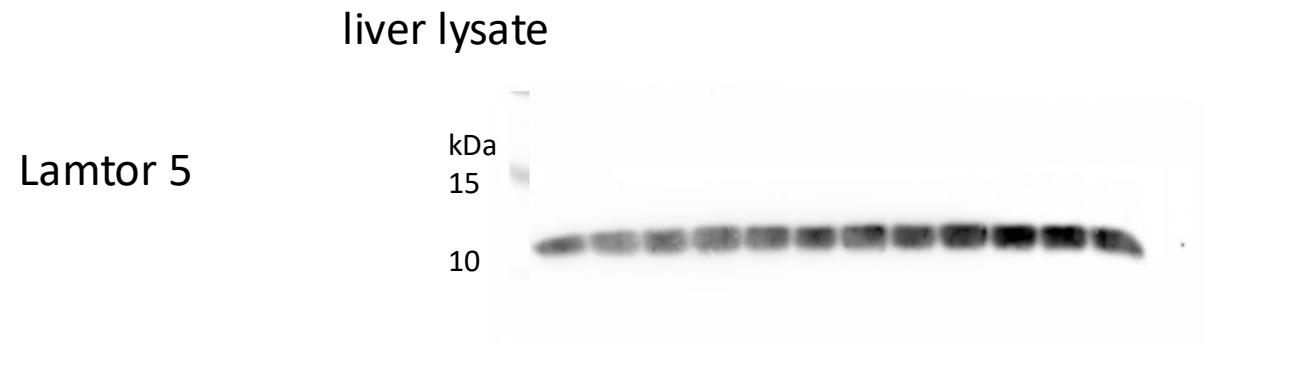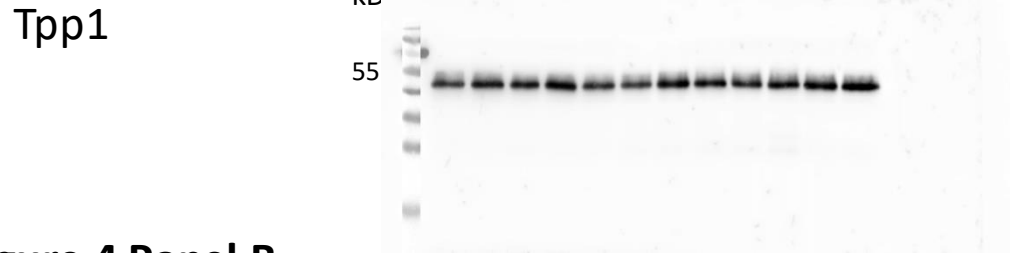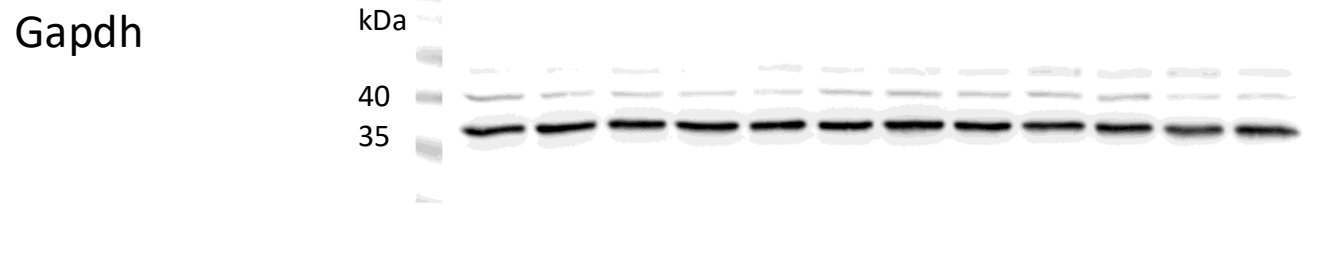

**Figure 4 Panel B**

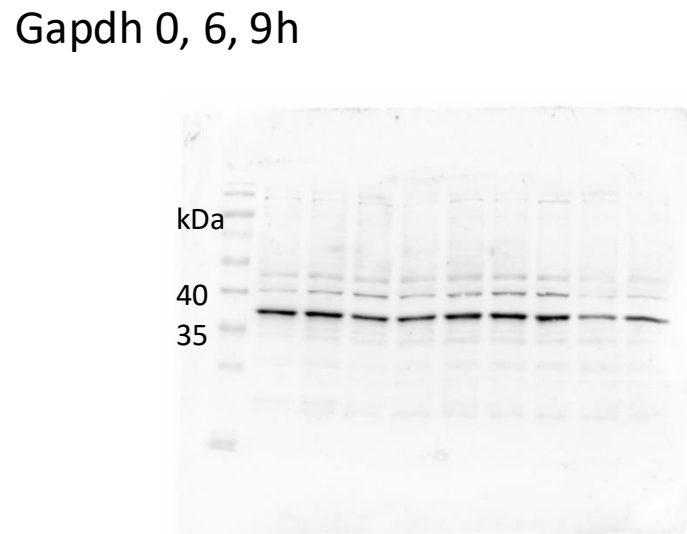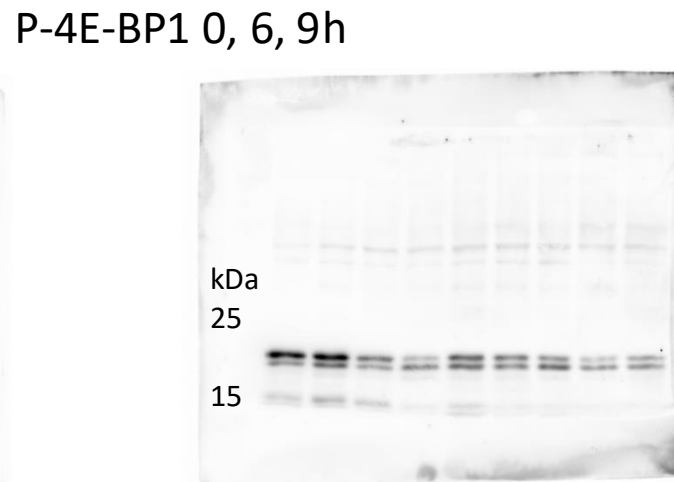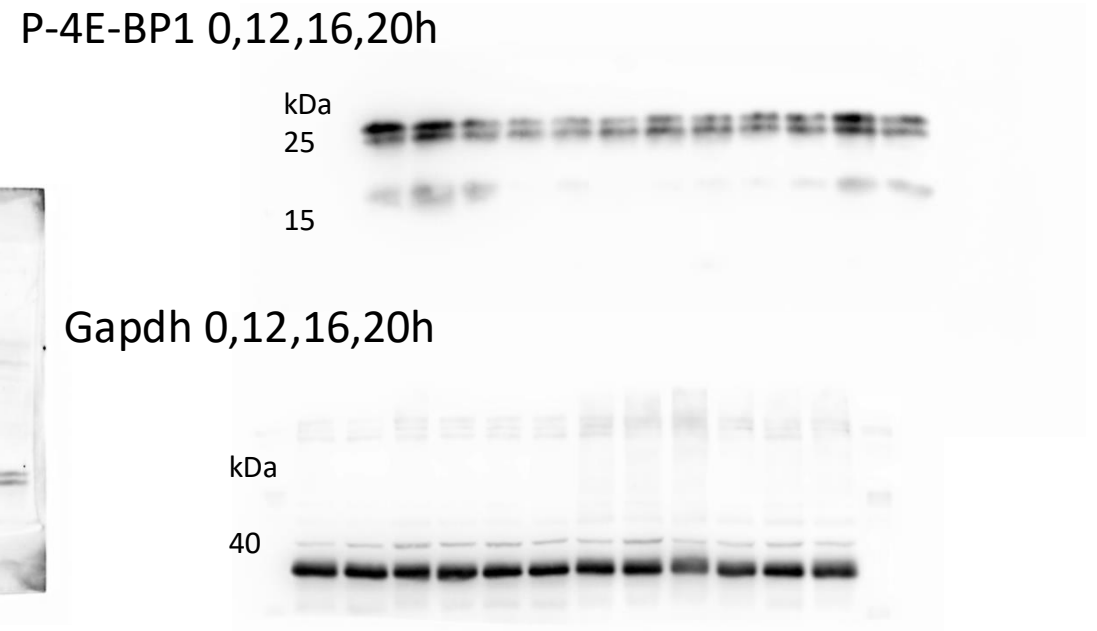

## Figure 4 Panel B

4E-BP1 0,6,9 h

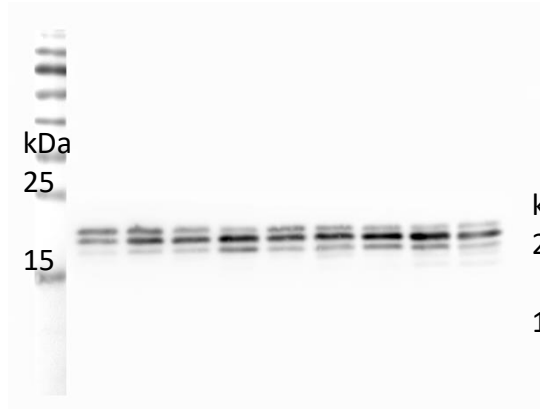

4E-BP1 0,12 h

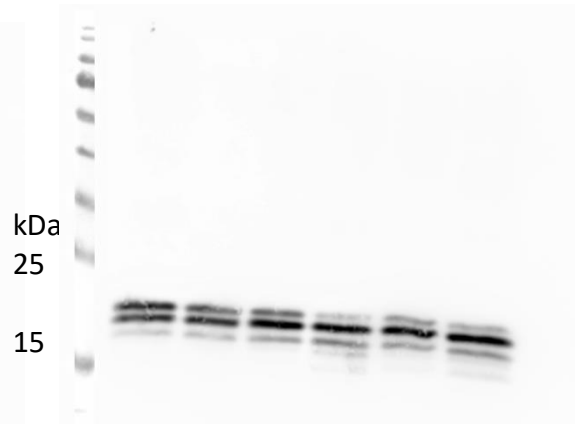

4E-BP1 0,16 h

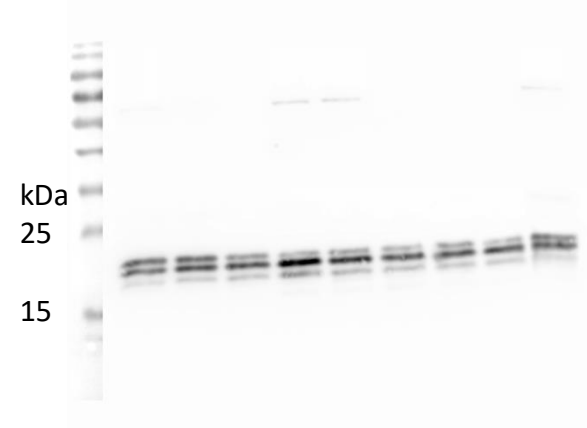

4E-BP1 0,20 h

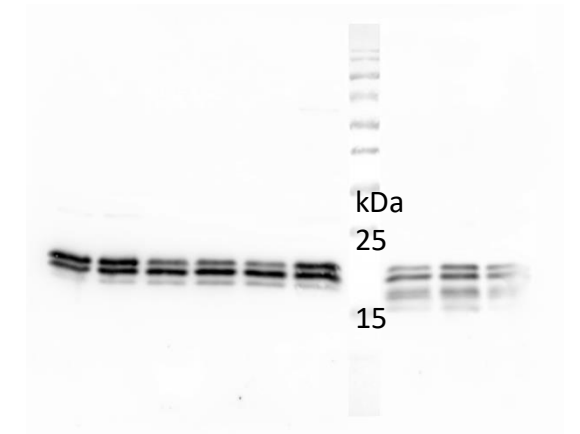

Gapdh 0, 6, 9, 12 h

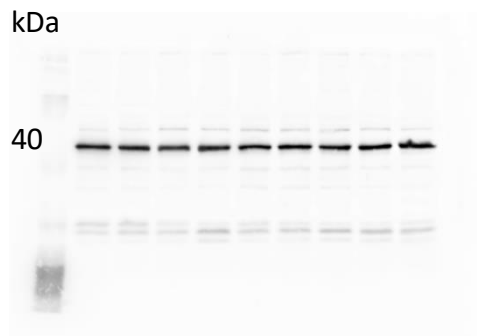

Gapdh 0,16,20 h

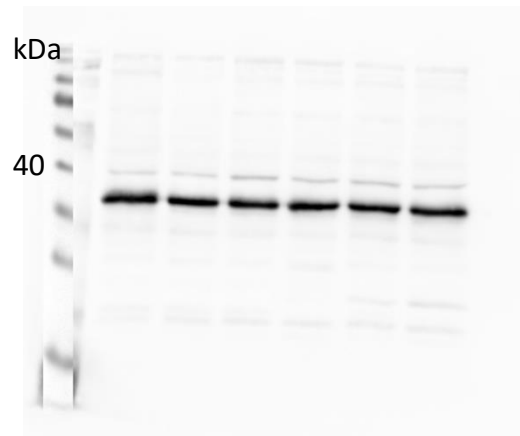

Gapdh 0,16 h

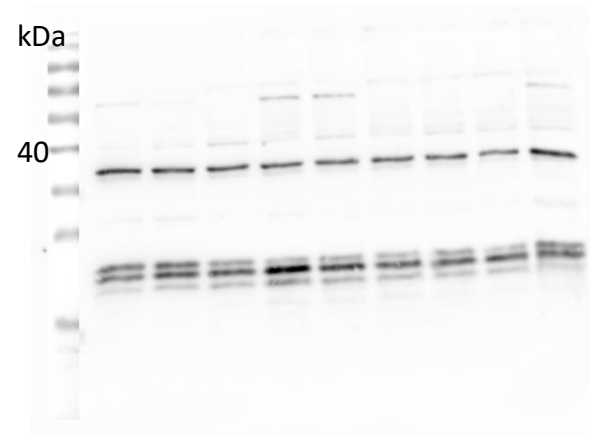

Gapdh 0, 20h

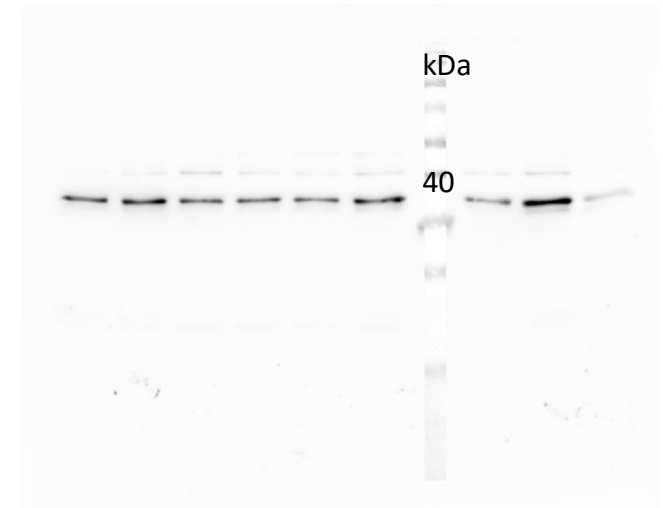

Last three lanes of blot are additional samples not displayed in this publication

Last three lanes of blot are additional samples not displayed in this publication

# Figure 4 Panel B

P-S6 0, 6, 9, 12 h

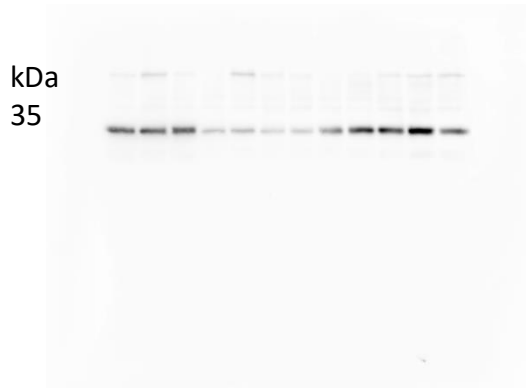

P-S6 0, 16, 20 h

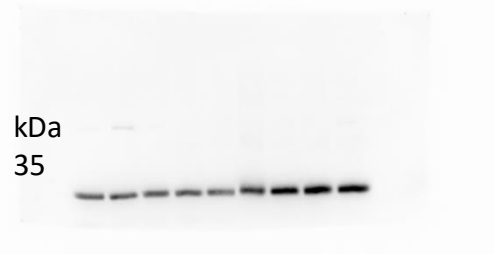

S6 0, 6, 9, 12 h

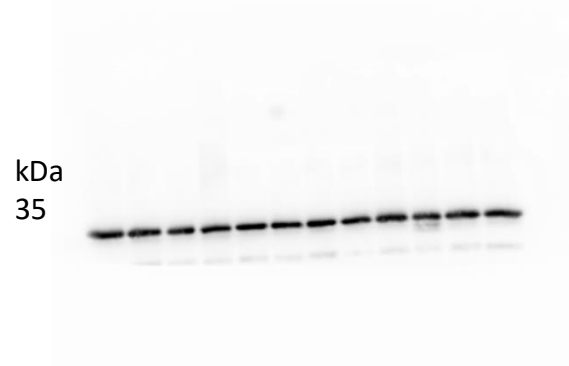

S6 0, 16, 20 h

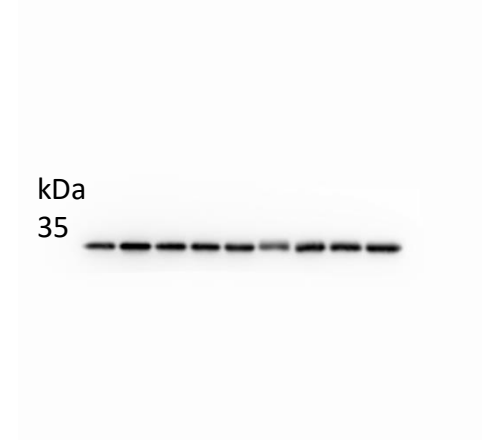

Gapdh 0, 6, 9, 12 h

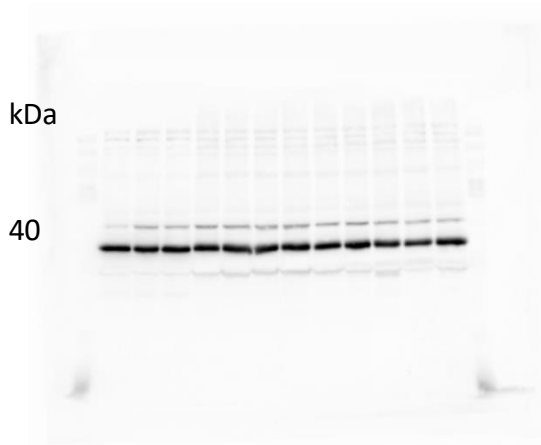

Gapdh 0, 16, 20 h

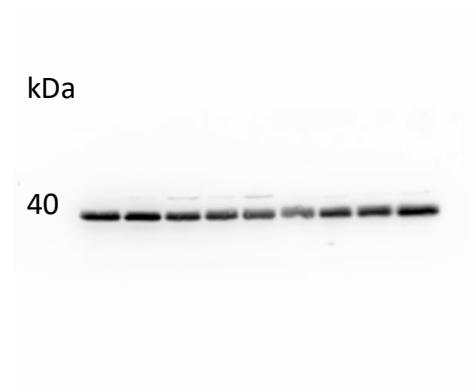

Gapdh 0, 16 h

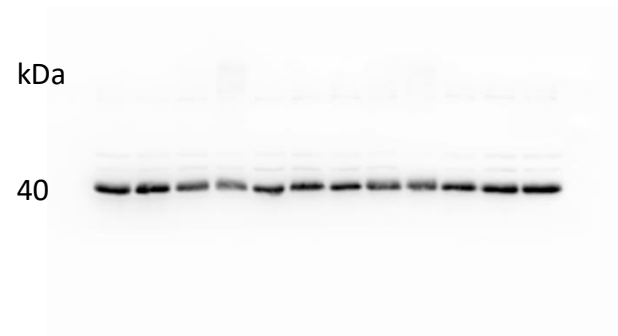

Gapdh 0, 20h

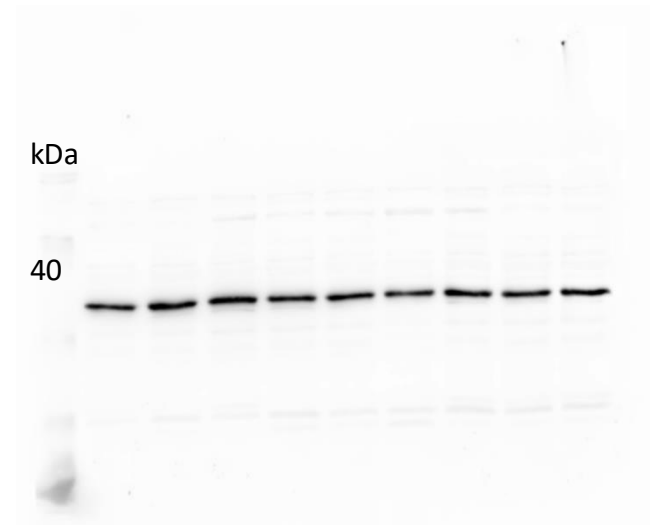

**Figure 4 Panel B**

**Figure 4 Panel C**

Lc3-B 0, 6, 9, 12 h

Lc3-B 0, 16, 20 h

P-4E-BP1 0, 6, 9, 12 h

P-4E-BP1 0, 16, 20 h

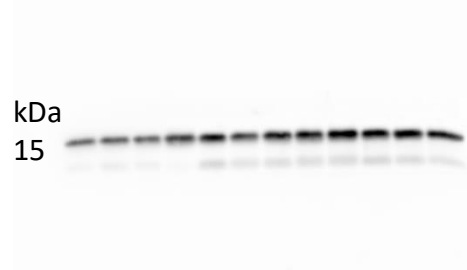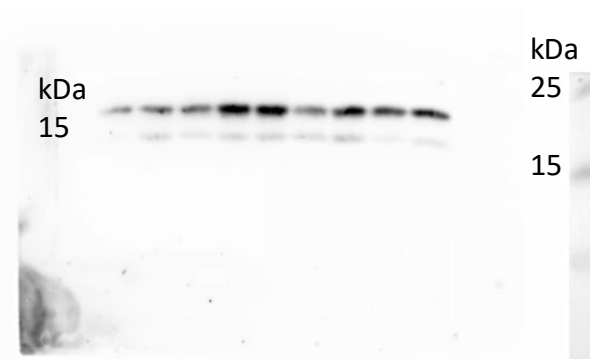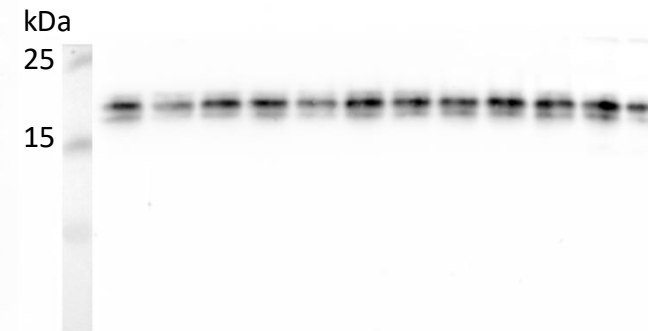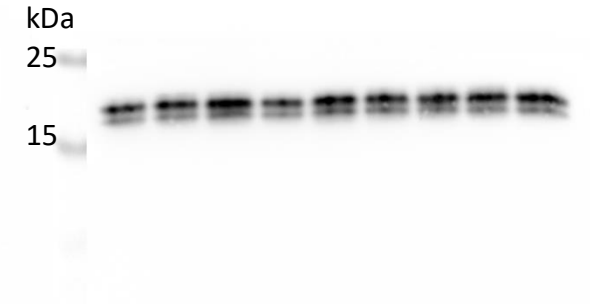

Gapdh 0, 6, 9, 12 h

Gapdh 0, 16, 20 h

Gapdh 0, 6, 9, 12 h

Gapdh 0, 16, 20 h

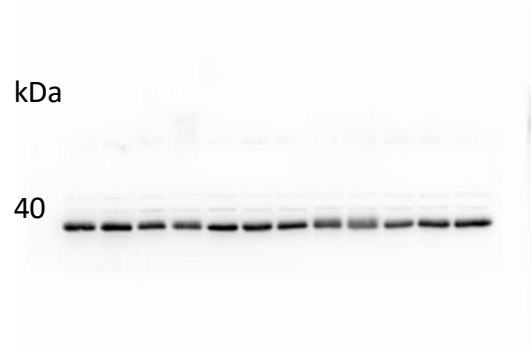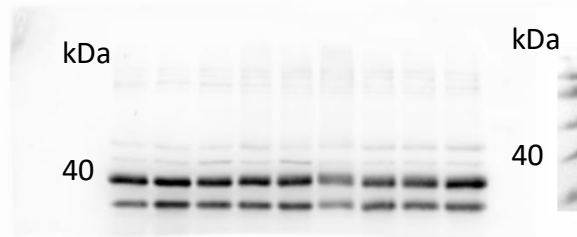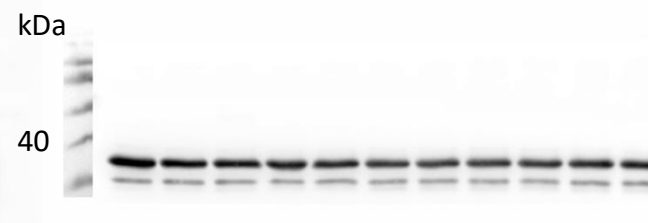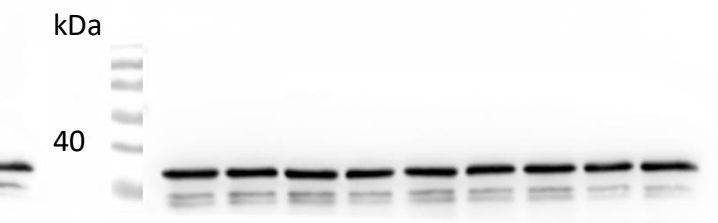



**Figure 4 Panel C**

4E-BP1 0, 6, 9 h

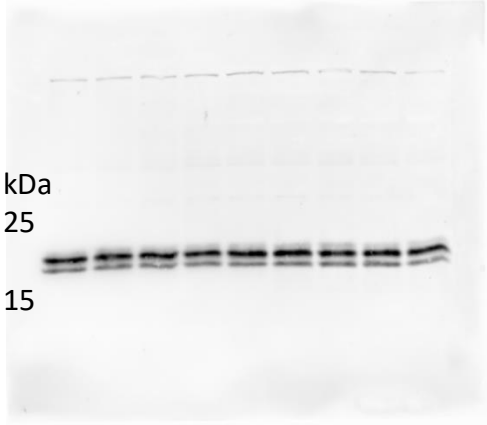

4E-BP1 0, 12 h

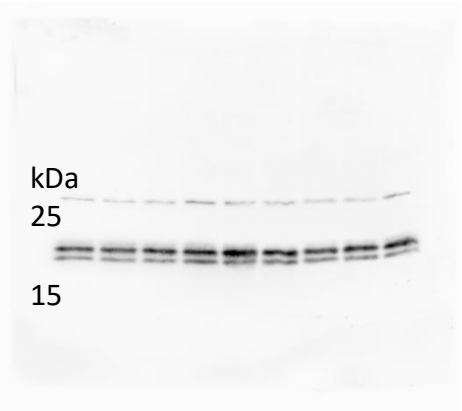

4E-BP1 0, 16, 20 h

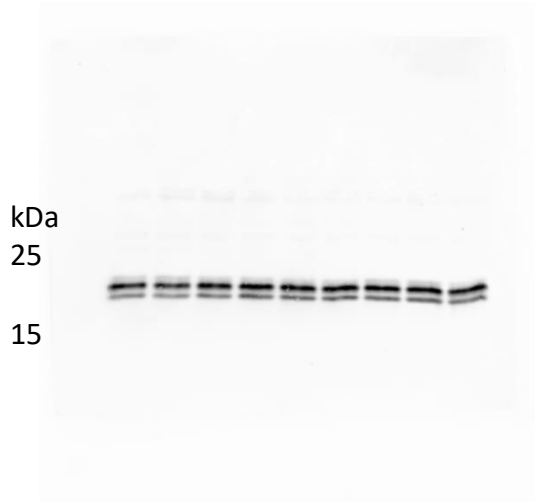

P-S6 0, 6, 9, 12 h

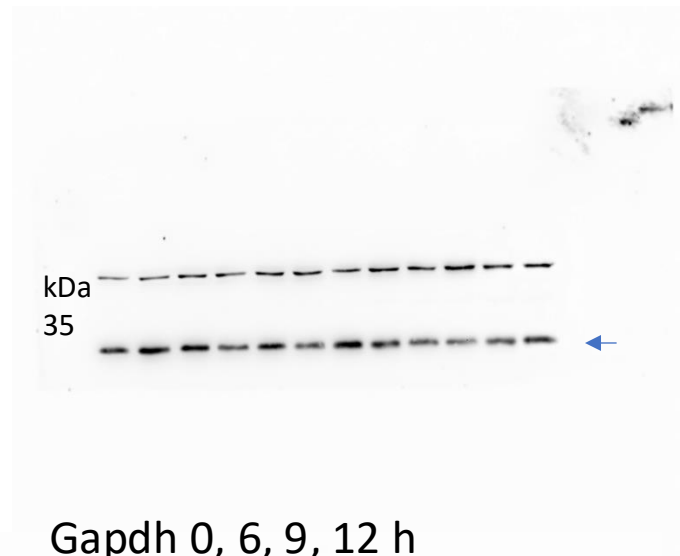

Gapdh 0, 6, 9 h

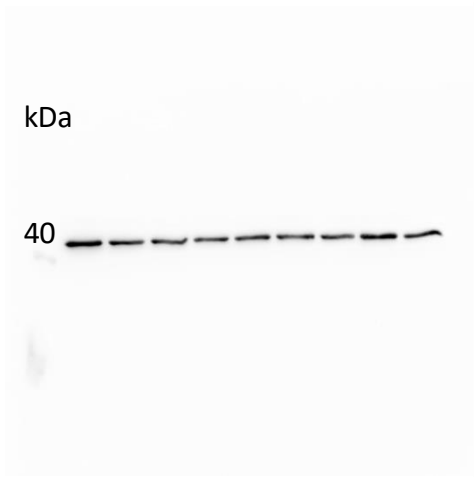

Gapdh 0, 16, 20 h

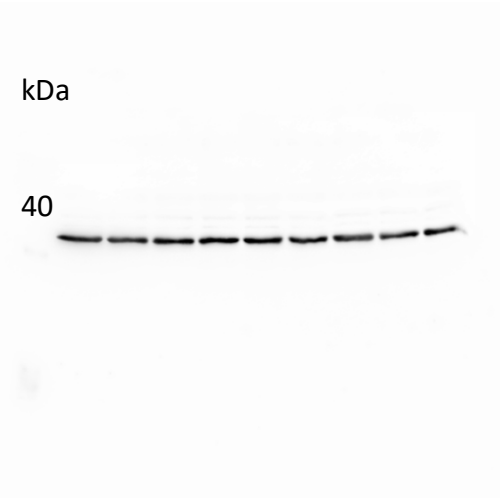

Gapdh 0, 6, 9, 12 h

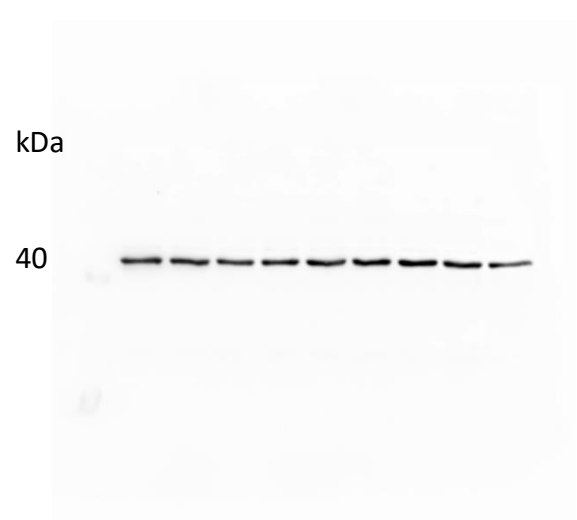

Gapdh 0, 6, 9, 12 h

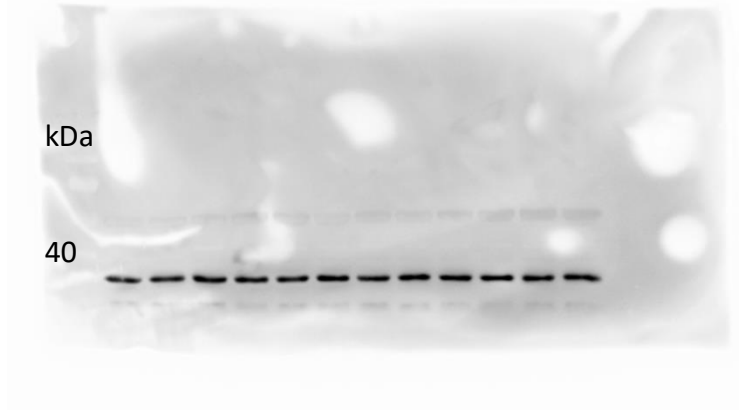

Last three lanes of blot are additional samples not displayed in this publication

Blot with several target exposures, p-S6 band marked with arrow

**Figure 4 Panel C**

P-S6 0, 16,20 h

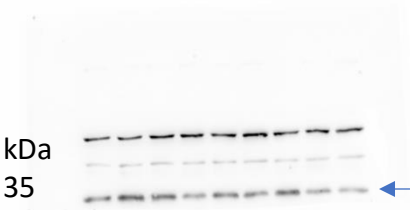

S6 0, 6, 9, 12 h

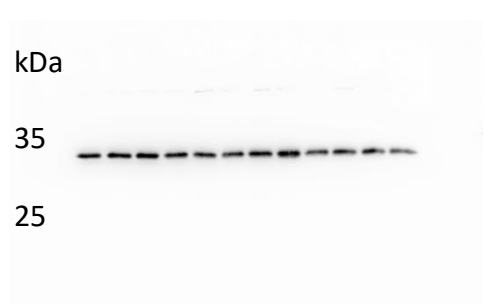

S6 0, 16,20 h

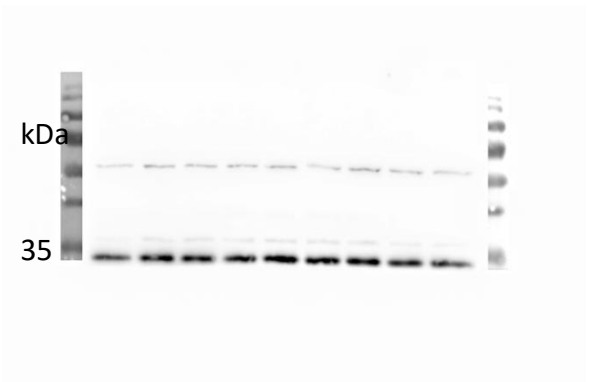

Lc3-B 0, 6, 9 h

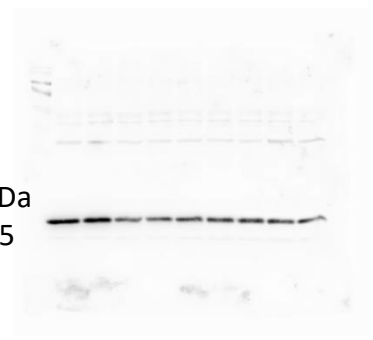

Gapdh 0, 16,20 h

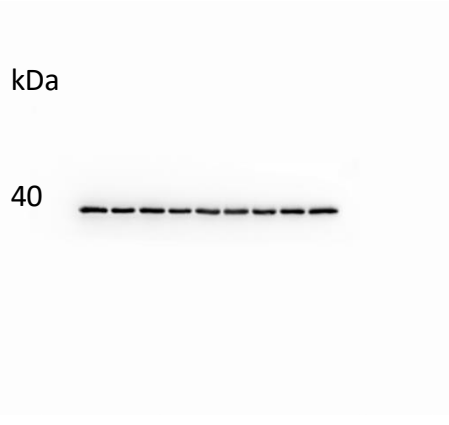

Gapdh 0, 6, 9, 12 h

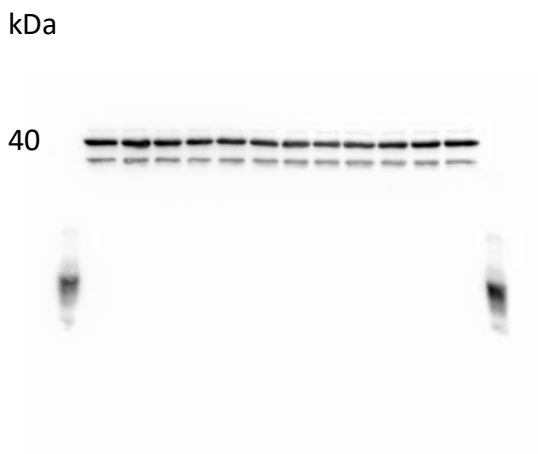

Gapdh 0,16,20 h

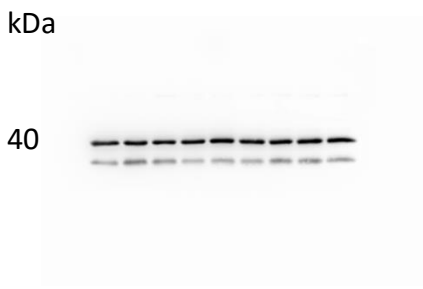

Gapdh 0, 6, 9, 12 h

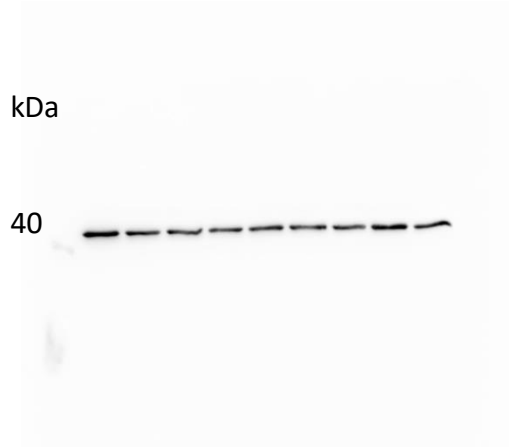

Blot with several target exposures, p-S6 band marked with arrow

**Figure 4 Panel C**

Lc3-B 0, 12 h

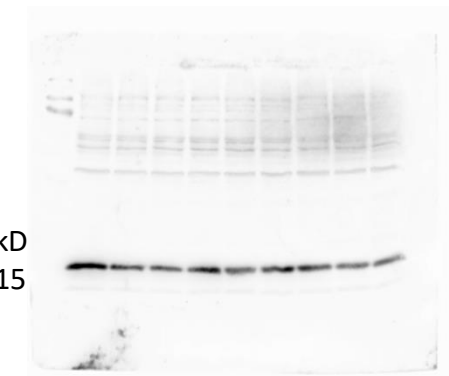

Lc3-B 0, 16, 20 h

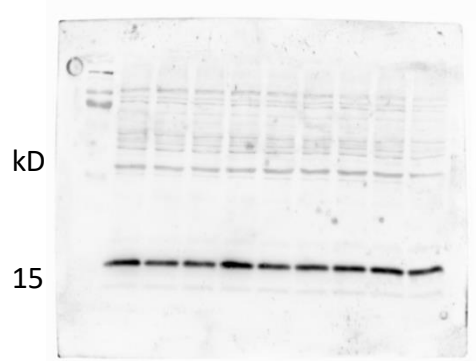

Gapdh 0, 12 h

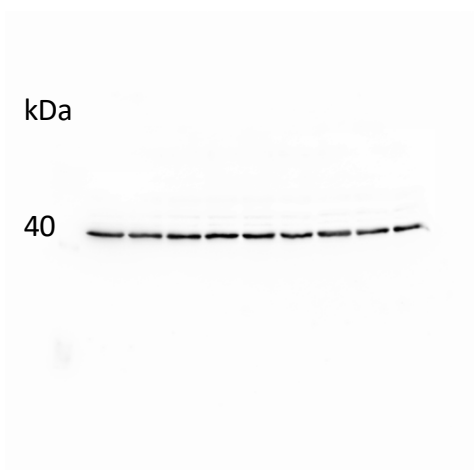

Gapdh 0, 16, 20 h

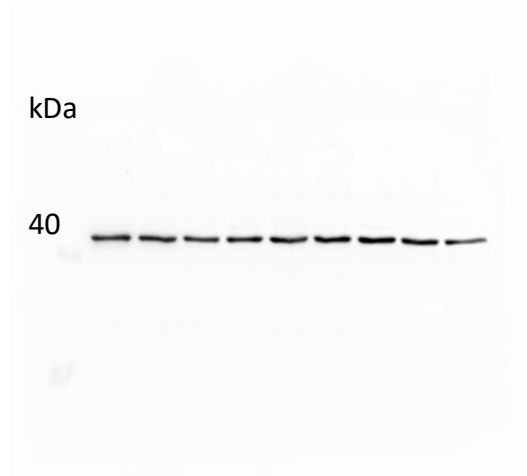

**Figure 4 Panel D**

P-4E-BP1 0,6,9,12 h

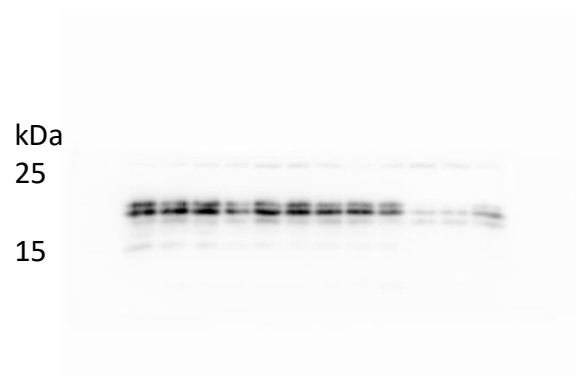

P-4E-BP1 0,16,20 h

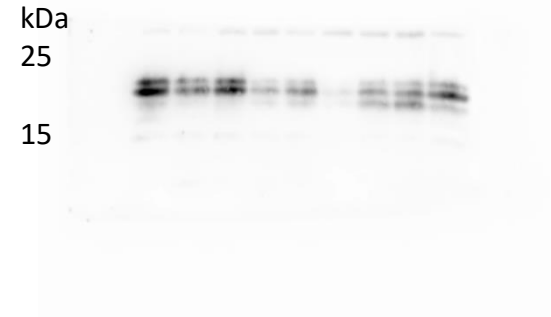

Gapdh 0, 6, 9, 12 h

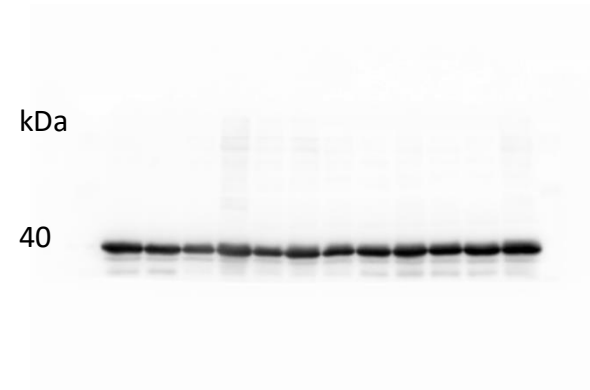

Gapdh 0, 16, 20 h

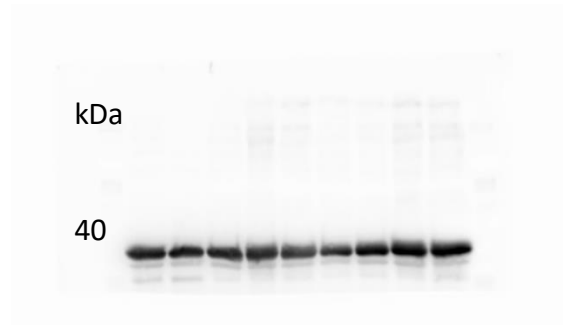

Last three lanes of blot are additional samples not displayed in this publication

**Figure 4 Panel D**

4E-BP1 0,6,9 h

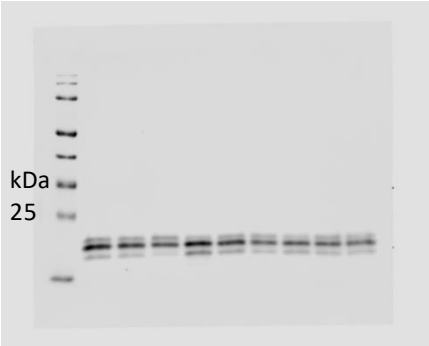

4E-BP1 0, 12 h

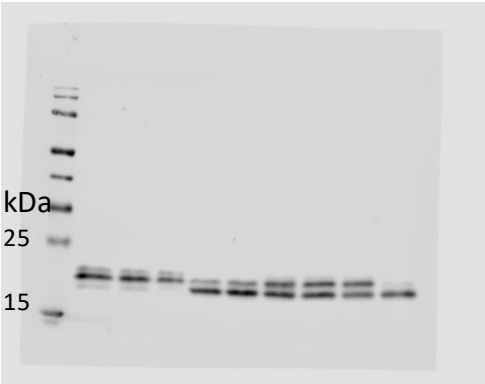

4E-BP1 0,16,20 h

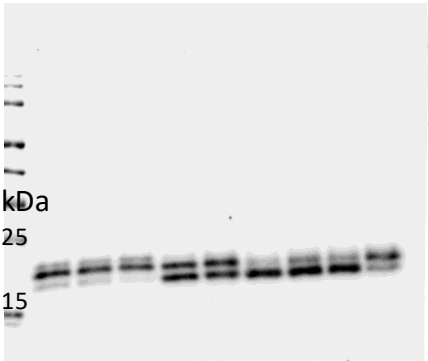

P-S6 0, 6, 9, 12 h

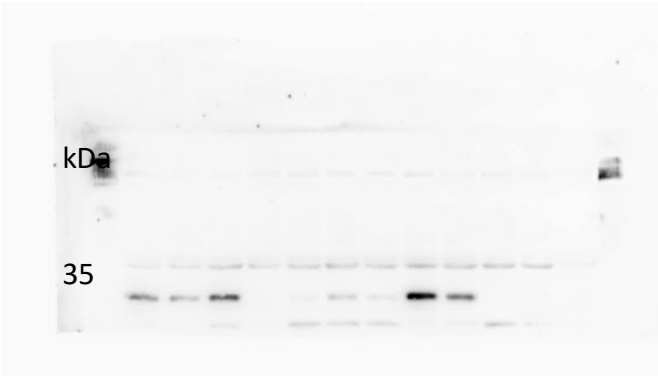

Gapdh 0,6,9 h

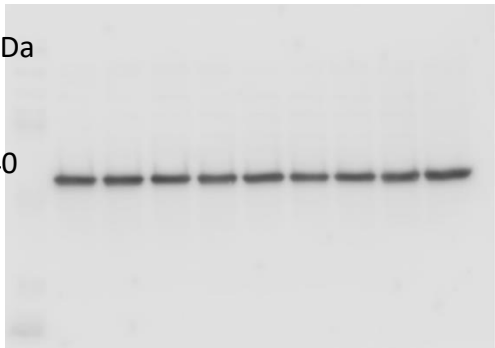

Gapdh 0, 12 h

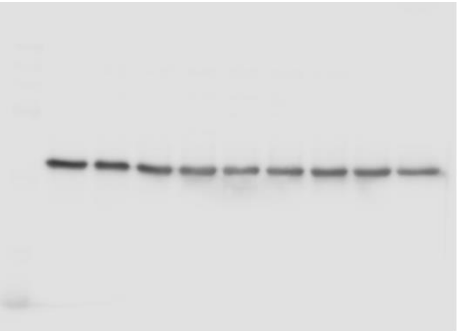

Gapdh 0, 16,20 h

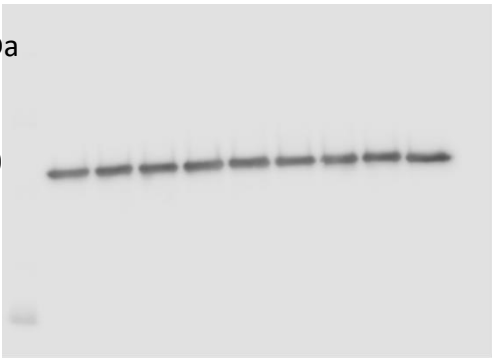

Gapdh 0,6,9,12 h

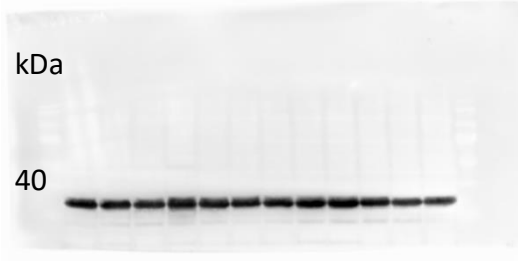

**Figure 4 Panel D**

P-S6 0, 16,20 h

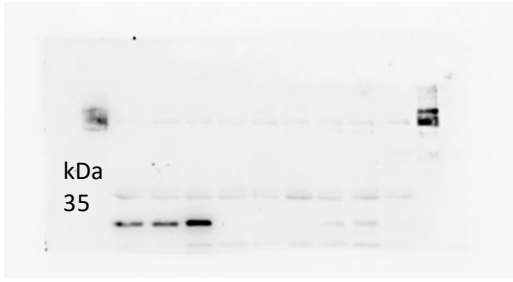

S6 0, 6,9,12 h

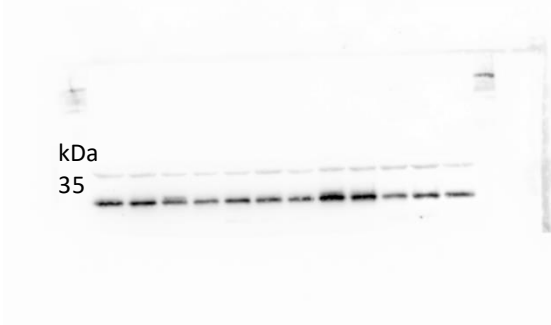

S6 0, 16,20 h

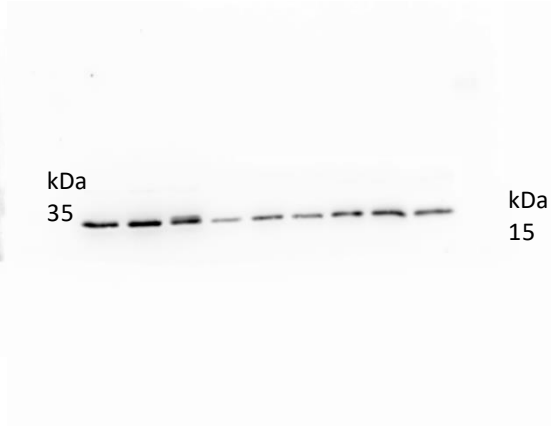

Lc3-B 0, 6, 9, 12 h

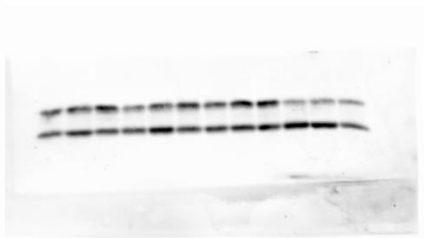

Lc3-B 0, 16, 20h

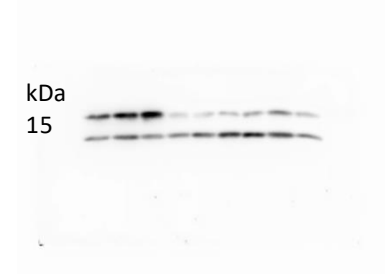

Gapdh 0,16,20 h

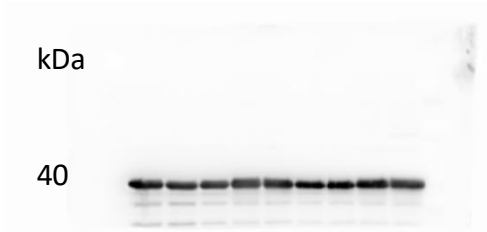

Gapdh 0,6,9, 12 h

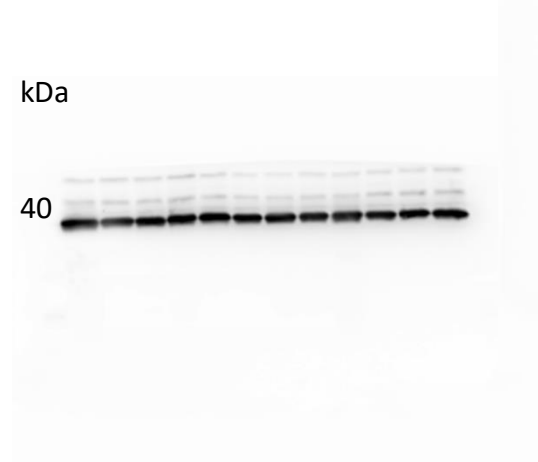

Gapdh 0, 16,20 h

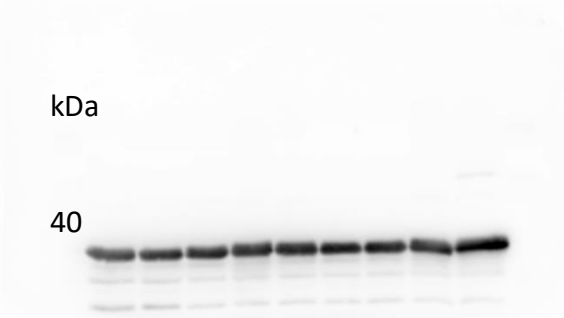

Gapdh 0,6,9, 12 h

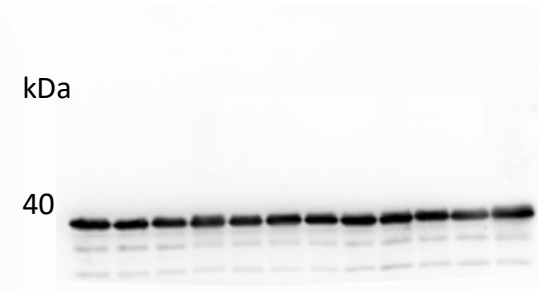

Gapdh 0, 16,20 h

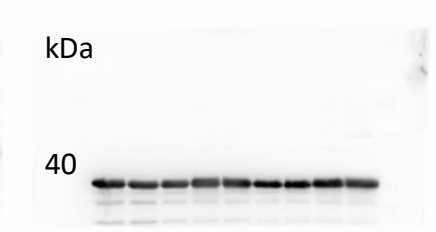

**Figure 5 Panel A**

tritosomes

whole liver

Psma7

Psmb5

Psma7

Psmb5

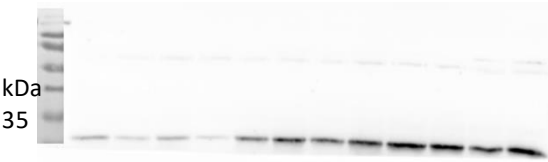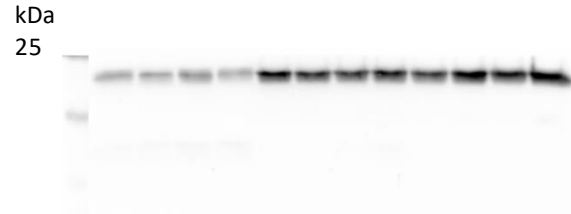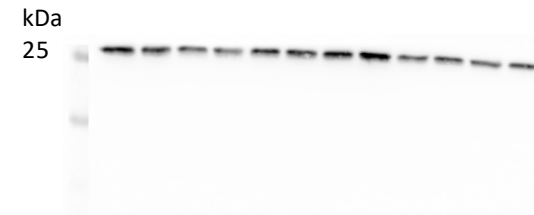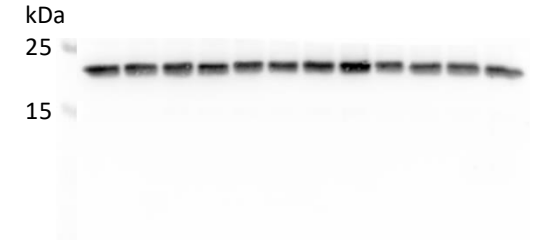

Tpp1

Tpp1

Gapdh

Gapdh

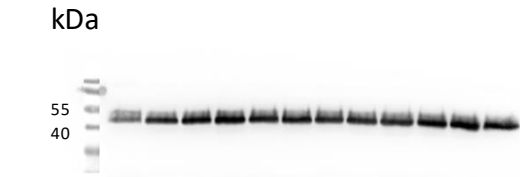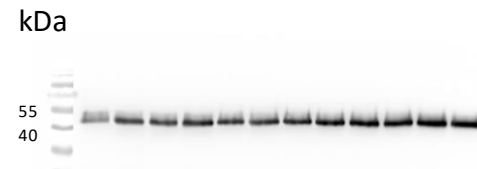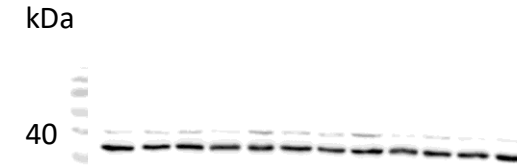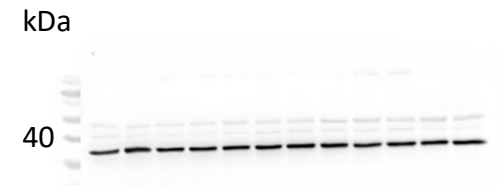

**Figure 5 Panel B**

Lonp2

Nudt12

Lonp2

Nudt12

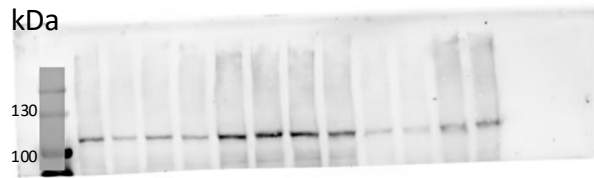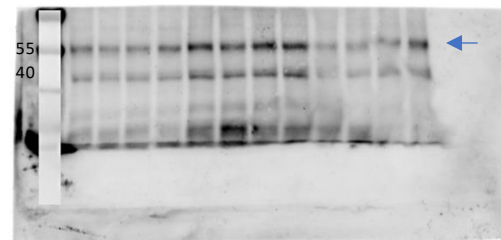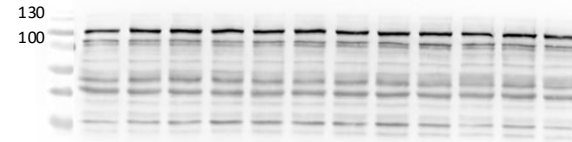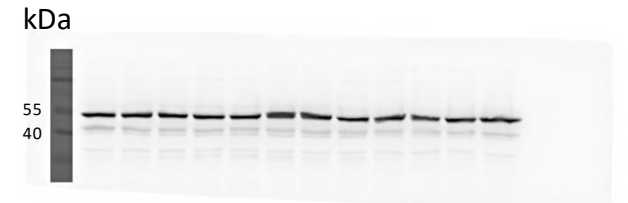

Tpp1

Tpp1

Gapdh

Gapdh

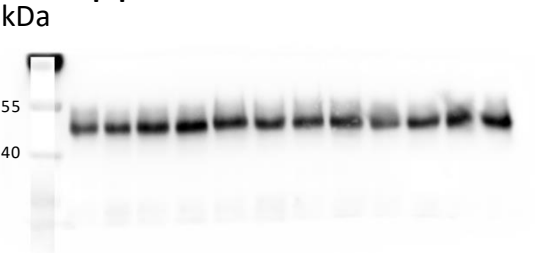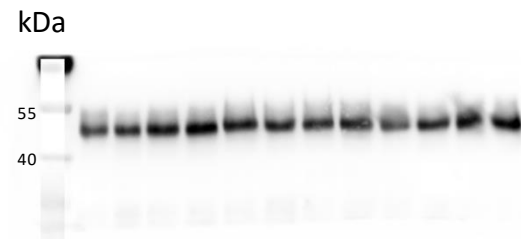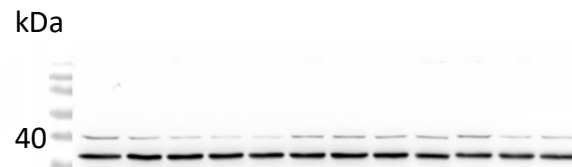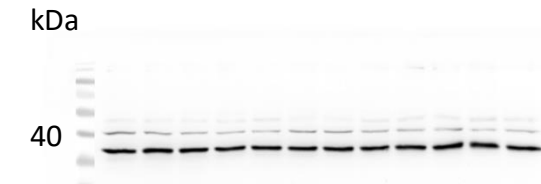

Note: Lonp2 and Nudt 12 were probed on the same membrane. Nudt marked by arrow due to previous signals.

Figure 5 Panel C

tritosomes

whole liver

Cpt2

Vdac1

Cpt2

Vdac1

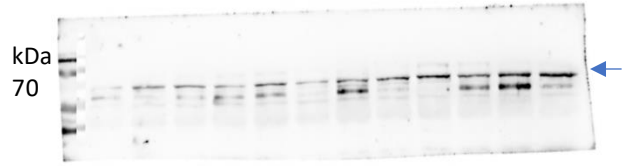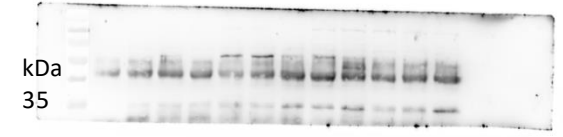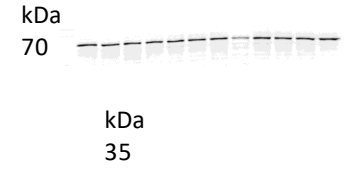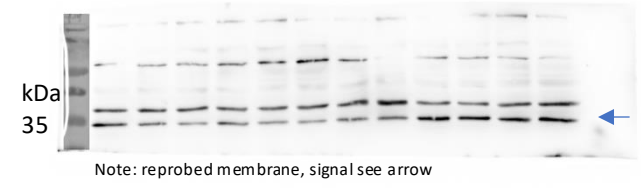

Note: reprobed membrane, upper signal is loading ocontrol

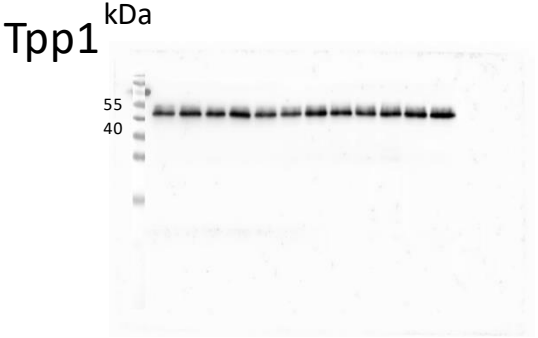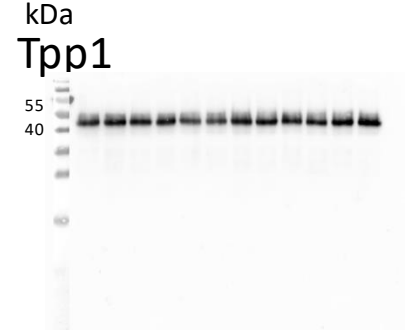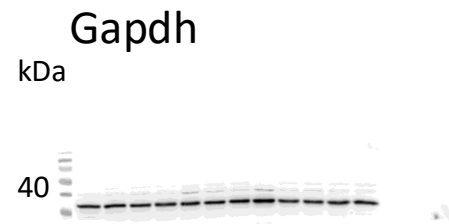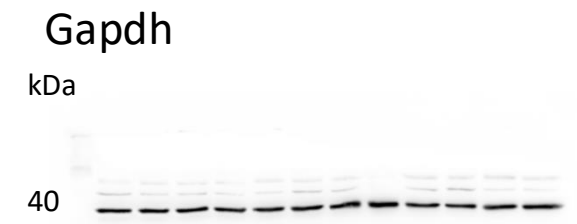

Ndufb7

Ndufb11

Ndufb7

Ndufb11

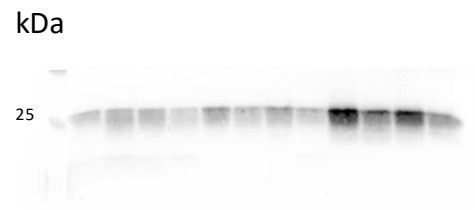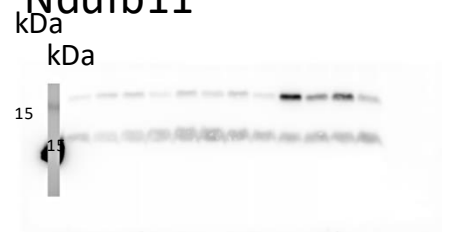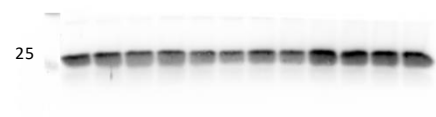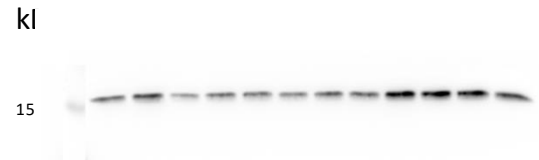

Tpp1

Tpp1

Gapdh

Gapdh

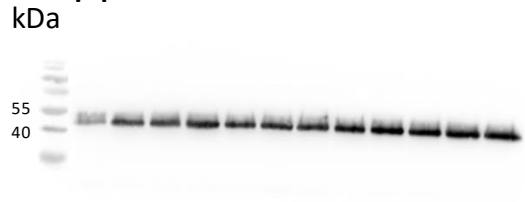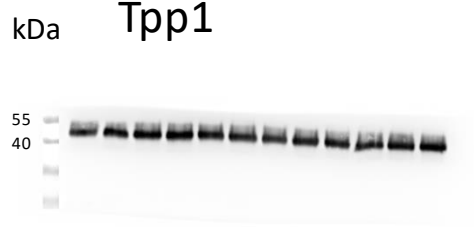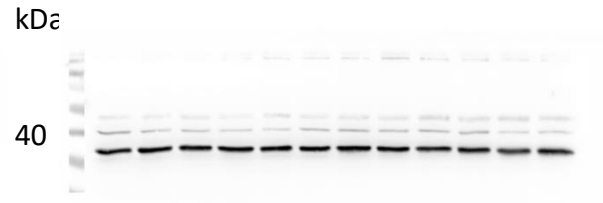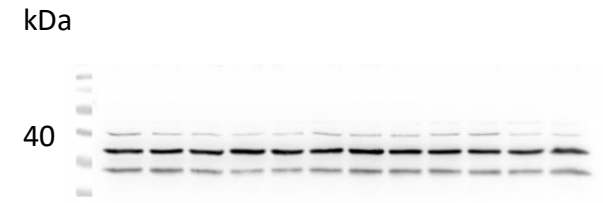

# Supplementary Figure 1

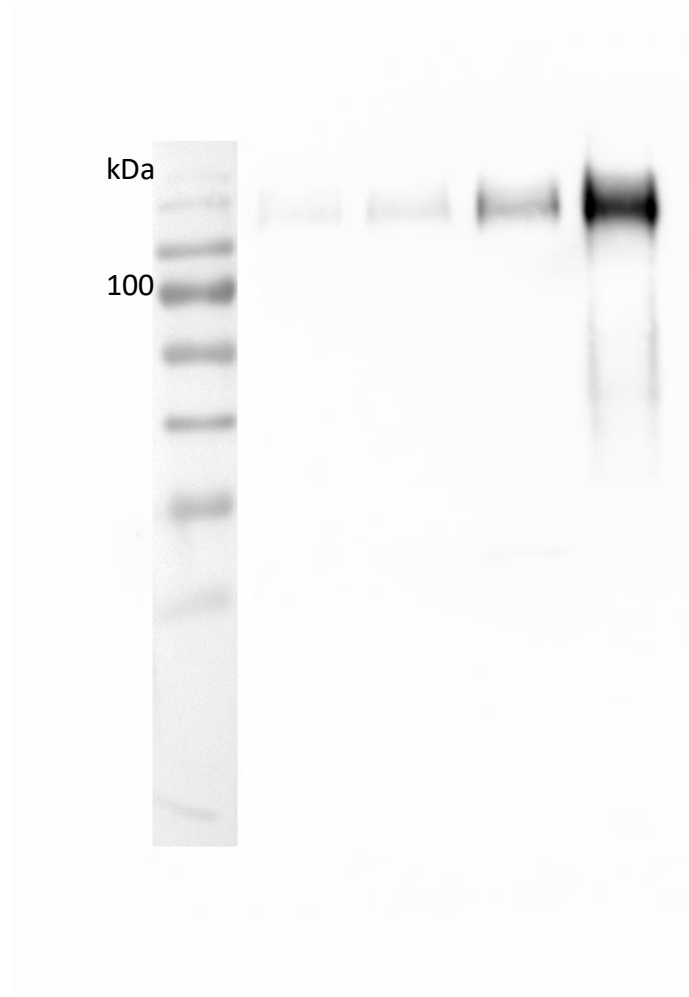

Lamp 1 0h

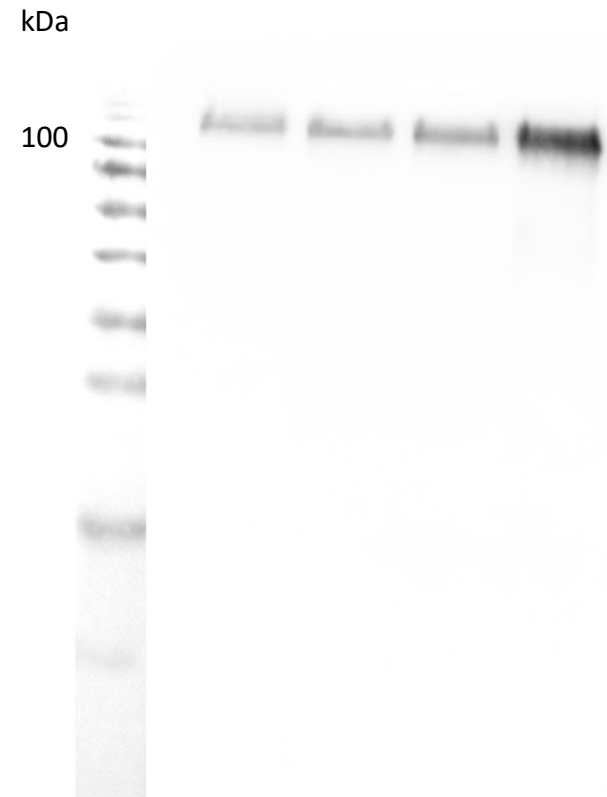

Lamp1 6h

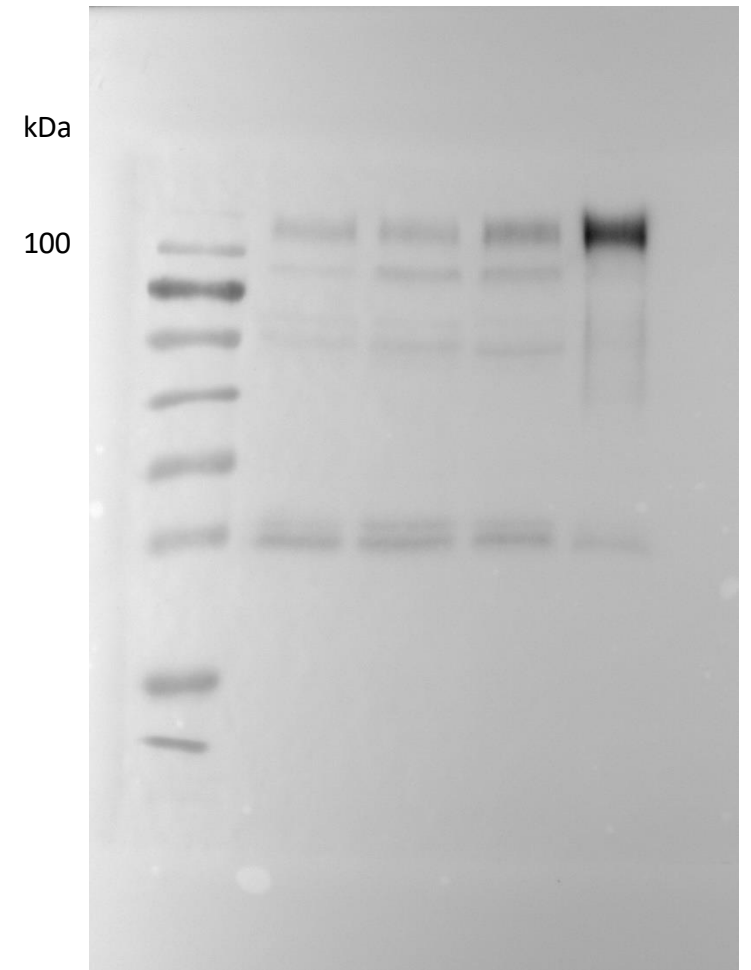

Lamp 1 24 h
